# Supplementary material for: Experience of Preimplantation Genetic Diagnosis with HLA Matching at the University Hospital Virgen del Rocío in Spain: Technical and Clinical Overview
Source: Hindawi journal article supplement (doi:10.1155/2014/560160), 2014-01-01
Supplement: f1 [file 560160.f1.pdf]

**Supplementary Table: Results of genotyping at HUVR**

|                                       | HLA+PGD | HLA-only | Total |
|---------------------------------------|---------|----------|-------|
| No of embryos analyzed                | 160     | 42       | 202   |
| No of embryos diagnosed               | 154     | 40       | 194   |
| % of embryos diagnosed                | 96.3    | 95.2     | 96.0  |
| No of HLA identical embryos           | 13      | 4        | 17    |
| % of HLA identical embryos            | 8.1     | 9.5      | 8.4   |
| No of HLA identical healthy embryos   | 10      | -        | 10    |
| % of HLA identical healthy embryos    | 6.3     | -        | 6.3   |
| No of affected embryos                | 50      | -        | 50    |
| No of non affected embryos            | 97      | -        | 97    |
| No of abnormal embryos                | 7       | 2        | 9     |
| % of abnormal embryos                 | 4.5     | 5.0      | 4.6   |
| No of embryos with monosomy           | 6       | 2        | 8     |
| No of embryos with trisomy            | -       | -        | -     |
| No of embryos with uniparental disomy | 1       | -        | 1     |
